# Supplementary material for: Comparison of the Physicochemical Properties of Carboxymethyl Agar Synthesized by Microwave-Assisted and Conventional Methods
Source: MDPI journal article supplement (doi:10.3390/gels8030162), 2022-03-04
Supplement: s1 [file s1]

## SUPPLEMENTARY INFORMATION

### Comparison of the Physicochemical Properties of Carboxymethyl Agar Synthesized by Microwave-Assisted and Conventional Methods

Bo Qi <sup>1,2</sup>, Shaoling Yang <sup>1,3,\*</sup>, Yongqiang Zhao <sup>1,\*</sup>, Yueqi Wang <sup>1</sup>, Xianqing Yang <sup>1</sup>, Shengjun Chen <sup>1</sup>, Yanyan Wu <sup>1</sup>, Chuang Pan <sup>1</sup>, Xiao Hu <sup>1</sup>, Chunsheng Li <sup>1</sup> and Lunan Wang <sup>1,4</sup>

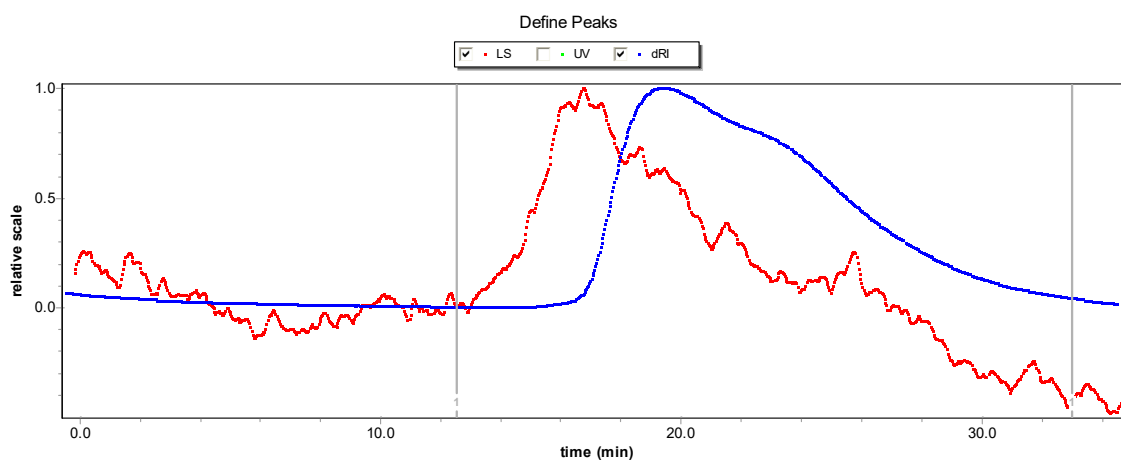

**Figure S1.** GPC chromatogram of original agar

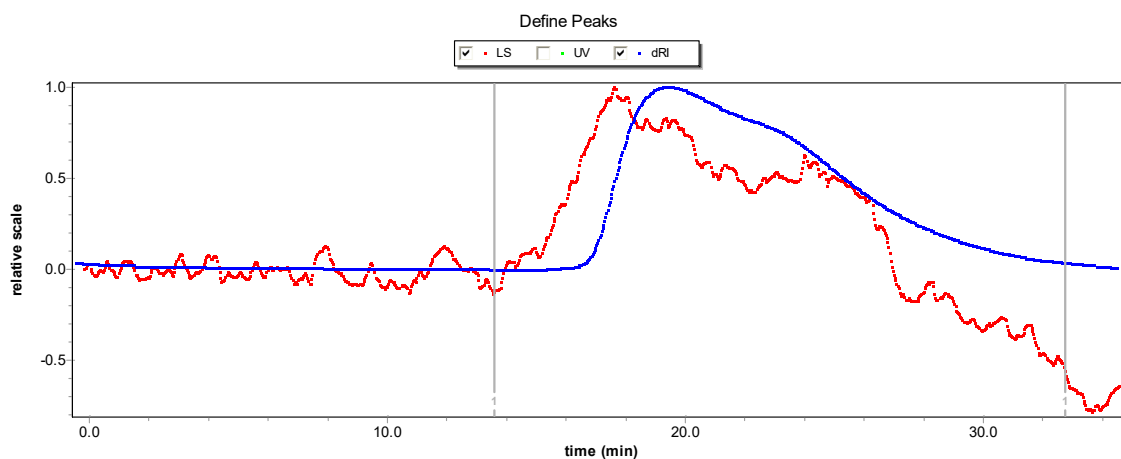

**Figure S2.** GPC chromatogram of carboxymethyl agar prepared using conventional method with DS of 0.25 (CAG1)

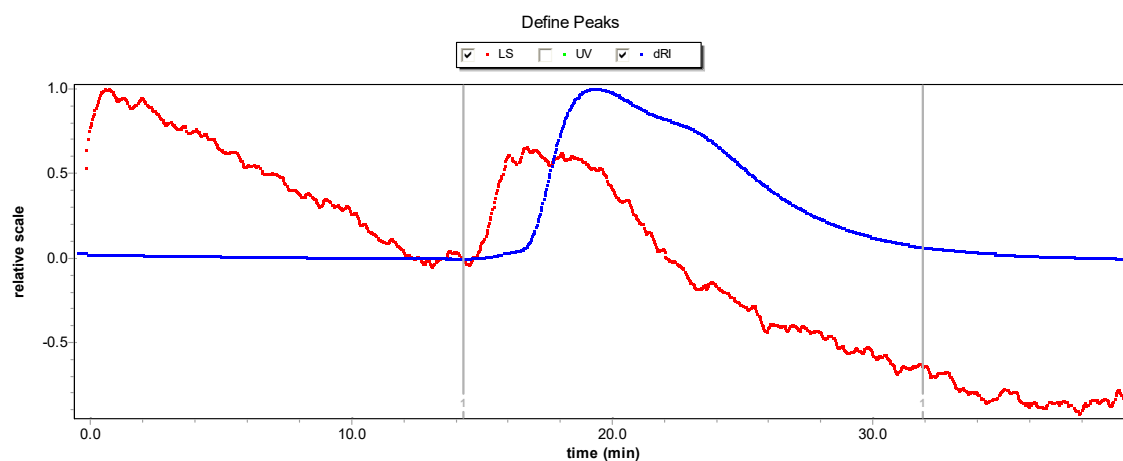

**Figure S3.** GPC chromatogram of carboxymethyl agar prepared using conventional method with DS of 0.47 (CAG2)

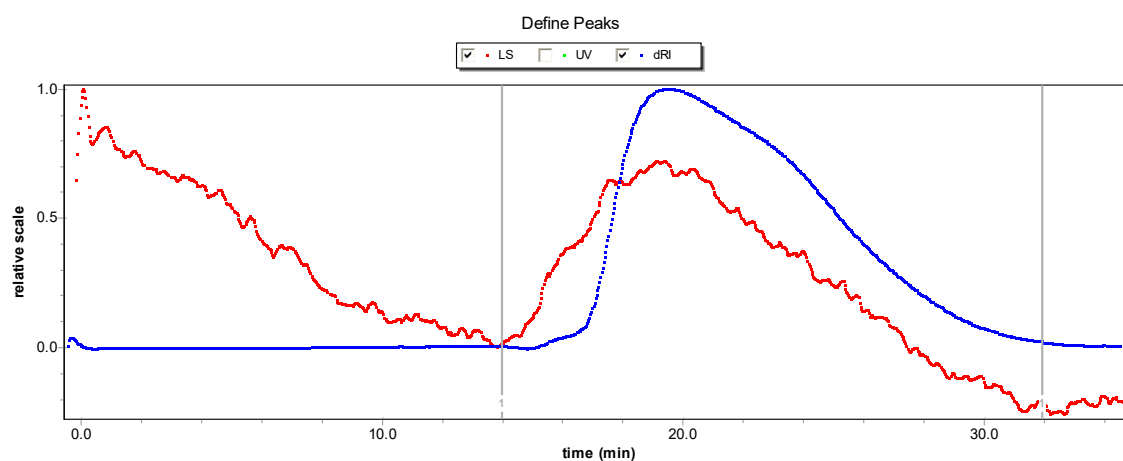

**Figure S4.** GPC chromatogram of carboxymethyl agar prepared using microwave-assisted method with DS of 0.25 (MAg1)

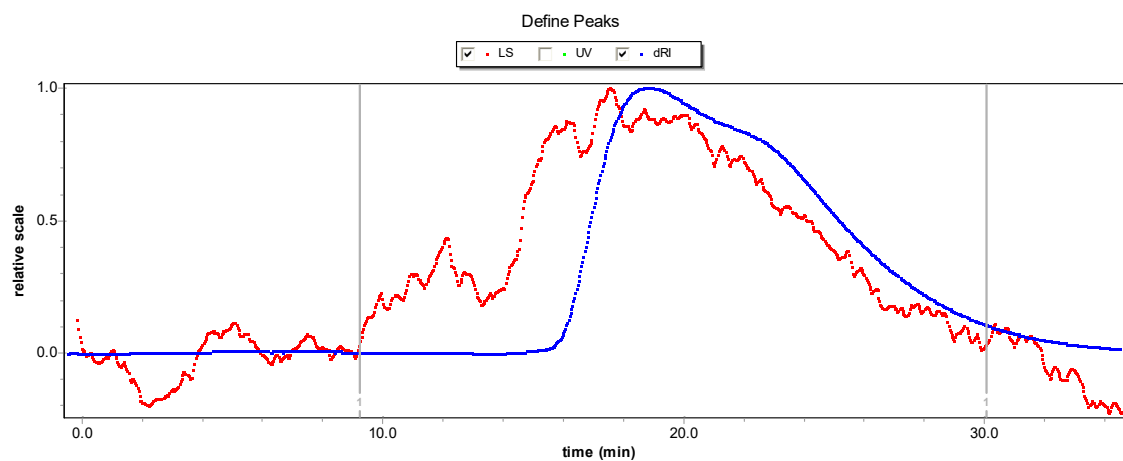

**Figure S5.** GPC chromatogram of carboxymethyl agar prepared using microwave-assisted method with DS of 0.48 (MAg2)

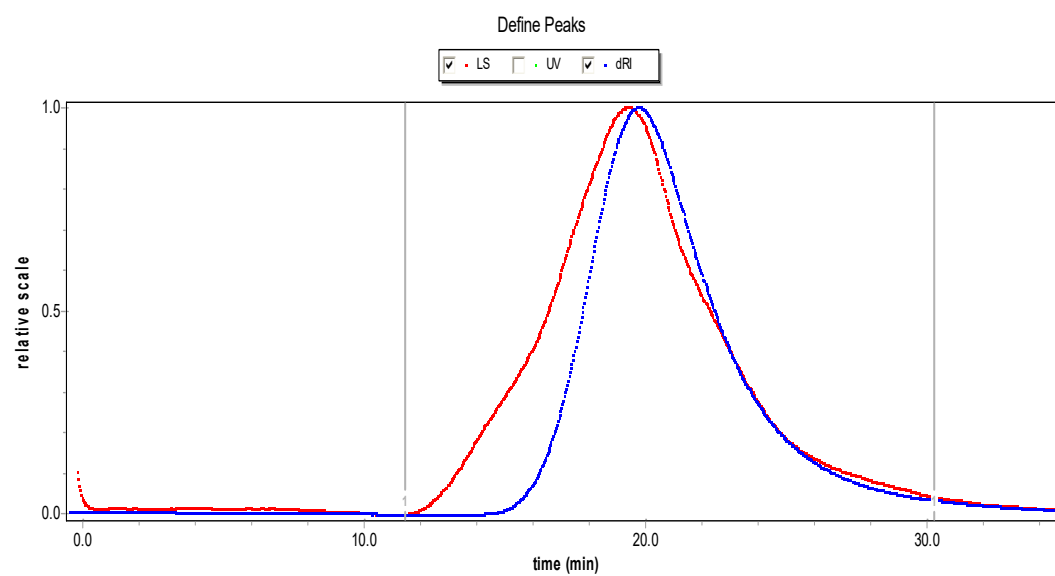

**Figure S6.** GPC chromatogram of dextran standards
